# Supplementary material
Source: PubMed Central journal article supplement (PMC6070753)
Supplement: AEM.00805-18_zam016188671s1.pdf [file AEM.00805-18_zam016188671s1.pdf]

**Supplemental materials for**  
**Hydrolase CehA and monooxygenase CfdC are responsible for the**  
**degradation of carbofuran in *Sphingomonas* sp. strain CDS-1**

Xin Yan,<sup>a,c</sup> Wen Jin,<sup>a</sup> Guang Wu,<sup>a</sup> Wankui Jiang,<sup>a</sup> Zhangong Yang,<sup>a</sup> Junbin Ji,<sup>a</sup> Jiguo Qiu,<sup>a</sup> Jian He,<sup>a,b</sup> Jiandong Jiang,<sup>a</sup> Qing Hong<sup>a#</sup>

<sup>a</sup> Key Laboratory of Agricultural Environmental Microbiology, Ministry of Agriculture, College of Life Sciences, Nanjing Agricultural University, Nanjing, Jiangsu 210095, PR China.

<sup>b</sup> Laboratory Center of Life Sciences, College of Life Sciences, Nanjing Agricultural University, Nanjing, Jiangsu 210095, PR China.

<sup>c</sup> Jiangsu Provincial Key Lab for Organic Solid Waste Utilization, Nanjing Agricultural University, Nanjing, 210095, China.

<sup>#</sup> Author for correspondence: Qing Hong

E-mail address: hongqing@njau.edu.cn;

Tel: +86-25-84396685; Fax: +86-25-84395326

The supplemental materials include one table and two figures.

**TABLE S1 Highly conserved ORFs ( $\geq 95\%$  nucleotides similarity) between carbofuran-degrading strains *Sphingomonas* sp. CDS-1 and *Novosphingobium* sp. KN65.2**

| Gene locus tags <sup>1</sup> | Scaffold No. | Product size <sup>2</sup> | Database used in BLASTP search | Homologous protein <sup>3</sup>                             | GenBank accession no. | Amino acid Identity (%) |
|------------------------------|--------------|---------------------------|--------------------------------|-------------------------------------------------------------|-----------------------|-------------------------|
| CBW6_4_RS00060               | 1            | 702                       | NR                             | <i>Novosphingobium</i> sp. KN65.2 hypothetical protein      | WP_054945771.1        | 97%                     |
|                              |              |                           | SwissProt                      | Quinohemoprotein alcohol dehydrogenase ADH IIB              | Q8GR64.1              | 32%                     |
| CBW6_4_RS00065               | 1            | 174                       | NR                             | <i>Novosphingobium</i> sp. KN65.2 hypothetical protein      | WP_054945770.1        | 98%                     |
|                              |              |                           | SwissProt                      | Protein ROS1                                                | Q9SJK6.2              | 43%                     |
| CBW6_4_RS00070               | 1            | 272                       | NR                             | <i>Novosphingobium</i> sp. KN65.2 hypothetical protein      | WP_054945769.1        | 96%                     |
|                              |              |                           | SwissProt                      | Probable phytanoyl-CoA dioxygenase                          | O62515.2              | 25%                     |
| CBW6_4_RS00075               | 1            | 449                       | NR                             | <i>Novosphingobium</i> sp. KN65.2 hypothetical protein      | WP_054945768.1        | 95%                     |
|                              |              |                           | SwissProt                      | Probable feruloyl esterase ARB_07085                        | D4AS70.1              | 33%                     |
| CBW6_4_RS19125               | 122          | 63                        | NR                             | <i>Sphingomonadaceae</i> MULTISPECIES: hypothetical protein | WP_048575073.1        | 100%                    |
|                              |              |                           | SwissProt                      | NA                                                          |                       |                         |
| CBW6_4_RS19130               | 122          | 275                       | NR                             | <i>Novosphingobium</i> sp. KN65.2 hypothetical protein      | CDO34422.1            | 100%                    |
|                              |              |                           | SwissProt                      | Mitochondrial distribution and morphology protein 10        | Q0TWV0.1              | 33%                     |
| CBW6_4_RS19135               | 122          | 92                        | NR                             | <i>Sphingomonadaceae</i> MULTISPECIES: hypothetical protein | WP_048575071.1        | 100%                    |
|                              |              |                           | SwissProt                      | NA                                                          |                       |                         |
| CBW6_4_RS19140               | 122          | 80                        | NR                             | <i>Sphingomonadaceae</i> MULTISPECIES: hypothetical protein | WP_053085602.1        | 100%                    |
|                              |              |                           | SwissProt                      | NA                                                          |                       |                         |
| CBW6_4_RS19145               | 122          | 108                       | NR                             | <i>Novosphingobium</i> sp. KN65.2 hypothetical protein      | CDO34419.1            | 100%                    |
|                              |              |                           | SwissProt                      | NA                                                          |                       |                         |
| CBW6_4_RS19150               | 122          | 412                       | NR                             | <i>Sphingomonadaceae</i> MULTISPECIES: hypothetical protein | WP_053085601.1        | 100%                    |
|                              |              |                           | SwissProt                      |                                                             |                       |                         |

|                       |     |     |                     |                                                                                                                              |                                |                 |
|-----------------------|-----|-----|---------------------|------------------------------------------------------------------------------------------------------------------------------|--------------------------------|-----------------|
|                       |     |     | SwissProt           | Probable conjugal transfer protein TrbI                                                                                      | P55406.1                       | 45%             |
| CBW6<br>4_RS1<br>9155 | 122 | 340 | NR<br><br>SwissProt | <i>Sphingomonas</i> sp.MEA3-1<br>hypothetical protein<br>Probable conjugal transfer protein TrbG                             | WP_053085600.1<br><br>P55404.1 | 100%<br><br>34% |
| CBW6<br>4_RS1<br>9160 | 122 | 228 | NR<br><br>SwissProt | <i>Sphingomonadaceae</i><br>MULTISPECIES:<br>conjugal transfer protein TrbF<br>Conjugal transfer protein TrbF                | WP_030091789.1<br><br>P54914.1 | 100%<br><br>29% |
| CBW6<br>4_RS1<br>9165 | 122 | 570 | NR<br><br>SwissProt | <i>Sphingomonadaceae</i><br>MULTISPECIES:<br>hypothetical protein<br>NA                                                      | WP_048575069.1                 | 100%            |
| CBW6<br>4_RS1<br>9175 | 122 | 331 | NR<br><br>SwissProt | <i>Sphingomonadaceae</i><br>MULTISPECIES:<br>hypothetical protein<br>Mediator of RNA polymerase II transcription subunit 20a | WP_082165950.1<br><br>Q6NPF4.1 | 100%<br><br>23% |
| CBW6<br>4_RS1<br>9180 | 122 | 827 | NR<br><br>SwissProt | <i>Sphingomonadaceae</i><br>MULTISPECIES:<br>conjugal transfer protein TrbE<br>Conjugal transfer protein TrbE                | WP_030091793.1<br><br>P54910.1 | 100%<br><br>39% |
| CBW6<br>4_RS1<br>9185 | 122 | 89  | NR<br><br>SwissProt | <i>Sphingomonadaceae</i><br>MULTISPECIES:<br>hypothetical protein<br>EVI5-like protein                                       | WP_030091794.1<br><br>Q96CN4.1 | 100%<br><br>52% |
| CBW6<br>4_RS1<br>9190 | 122 | 107 | NR<br><br>SwissProt | <i>Sphingomonadaceae</i><br>MULTISPECIES:<br>conjugal transfer protein TrbC<br>Probable conjugal transfer protein TrbC       | WP_030091795.1<br><br>P55396.1 | 100%<br><br>39% |
| CBW6<br>4_RS1<br>9195 | 122 | 318 | NR<br><br>SwissProt | <i>Sphingomonadaceae</i><br>MULTISPECIES:<br>conjugal transfer protein TrbB<br>Probable conjugal transfer protein TrbB       | WP_030091796.1<br><br>P55395.1 | 100%<br><br>45% |
| CBW6<br>4_RS1<br>9200 | 122 | 653 | NR<br><br>SwissProt | <i>Sphingomonas</i> sp. MEA3-1<br>hypothetical protein<br>DNA topoisomerase 3                                                | WP_048575096.1<br><br>P96583.1 | 100%<br><br>30% |
| CBW6<br>4_RS1<br>9205 | 122 | 198 | NR<br><br>SwissProt | <i>Sphingomonas</i> sp. MEA3-1<br>conjugal transfer protein TraG<br>Transcription initiation factor                          | WP_053085605.1<br><br>Q91857.3 | 100%<br><br>34% |

|                       |     |     |                     |                                                                                                                   |                                |                 |
|-----------------------|-----|-----|---------------------|-------------------------------------------------------------------------------------------------------------------|--------------------------------|-----------------|
|                       |     |     |                     | TFIID subunit 6                                                                                                   |                                |                 |
| CBW6<br>4_RS2<br>0215 | 139 | 524 | NR<br><br>SwissProt | <i>Novosphingobium</i> sp. KN65.2<br>Conjugal transfer protein<br>TraG, partial<br>Conjugal transfer protein TraG | WP_054944397.1<br><br>Q00185.1 | 94%<br><br>33%  |
| CBW6<br>4_RS2<br>0220 | 139 | 509 | NR<br><br>SwissProt | <i>Sphingomonadaceae</i><br>MULTISPECIES:<br>hypothetical protein<br>Conjugal transfer protein TraA               | WP_048575095.1<br><br>Q44349.2 | 100%<br><br>36% |
| CBW6<br>4_RS2<br>0225 | 139 | 142 | NR<br><br>SwissProt | <i>Sphingomonadaceae</i><br>MULTISPECIES:<br>hypothetical protein<br>Homeobox protein MOX-1                       | WP_048575094.1<br><br>P32442.1 | 100%<br><br>35% |
| CBW6<br>4_RS2<br>0230 | 139 | 299 | NR<br><br>SwissProt | <i>Sphingomonas</i> sp. MEA3-1<br>hypothetical protein<br>L-lactate dehydrogenase B<br>chain                      | WP_053085604.1<br><br>Q9XT86.3 | 100%<br><br>48% |
| CBW6<br>4_RS2<br>0235 | 139 | 176 | NR<br><br>SwissProt | <i>Sphingomonadaceae</i><br>MULTISPECIES:<br>hypothetical protein<br>Plasmid transfer protein TraF                | WP_048575093.1<br><br>Q03450.1 | 100%<br><br>32% |
| CBW6<br>4_RS2<br>0240 | 139 | 109 | NR<br><br>SwissProt | <i>Sphingomonadaceae</i><br>MULTISPECIES:<br>hypothetical protein<br>NA                                           | WP_048575092.1                 | 100%            |
| CBW6<br>4_RS2<br>0245 | 139 | 226 | NR<br><br>SwissProt | <i>Sphingomonas</i> sp. MEA3-1<br>Chromosome partitioning<br>protein ParA<br>Protein ParA                         | WP_048575091.1<br><br>P07175.1 | 100%<br><br>38% |
| CBW6<br>4_RS2<br>0250 | 139 | 85  | NR<br><br>SwissProt | <i>Sphingomonadaceae</i><br>MULTISPECIES:<br>Antitoxin<br>Antitoxin PemI                                          | WP_048575090.1<br><br>P13975.1 | 100%<br><br>53% |
| CBW6<br>4_RS2<br>0255 | 139 | 108 | NR<br><br>SwissProt | <i>Sphingomonadaceae</i><br>MULTISPECIES:<br>pemk protein<br>Endoribonuclease PemK                                | WP_048575089.1<br><br>P13976.1 | 100%<br><br>58% |
| CBW6<br>4_RS2<br>0260 | 139 | 101 | NR<br><br>SwissProt | <i>Sphingomonadaceae</i><br>MULTISPECIES:<br>transcriptional regulator<br>Uncharacterized protein<br>HI_1420      | WP_030091807.1<br><br>P44191.1 | 100%<br><br>49% |
| CBW6<br>4_RS2         | 139 | 102 | NR                  | <i>Sphingomonadaceae</i><br>MULTISPECIES:                                                                         | WP_030091808.1                 | 100%            |

|                       |     |     |                     |                                                                                                                                                        |                                |                 |
|-----------------------|-----|-----|---------------------|--------------------------------------------------------------------------------------------------------------------------------------------------------|--------------------------------|-----------------|
| 0265                  |     |     | SwissProt           | addiction module antitoxin<br>RelB<br>Uncharacterized protein<br>HI_1419                                                                               | P44190.1                       | 58%             |
| CBW6<br>4_RS2<br>0270 | 139 | 217 | NR<br><br>SwissProt | <i>Sphingomonas</i> sp. MEA3-1<br>hypothetical protein<br>Imidazole glycerol phosphate<br>synthase subunit HisF                                        | WP_048575088.1<br><br>Q7SIB9.1 | 100%<br><br>48% |
| CBW6<br>4_RS2<br>0275 | 139 | 299 | NR<br><br>SwissProt | <i>Sphingomonadaceae</i><br>MULTISPECIES:<br>hypothetical protein<br>Antitoxin HicB 2                                                                  | WP_048575087.1<br><br>Q7MZD8.1 | 99%<br><br>28%  |
| CBW6<br>4_RS2<br>0280 | 139 | 96  | NR<br><br>SwissProt | <i>Novosphingobium</i> sp. KN65.2<br>hypothetical protein<br>Enolase                                                                                   | WP_054944302.1<br><br>Q5GTG4.1 | 100%<br><br>36% |
| CBW6<br>4_RS2<br>0285 | 139 | 108 | NR<br><br>SwissProt | <i>Sphingomonadaceae</i><br>MULTISPECIES:<br>single-stranded DNA-binding<br>protein<br>NA                                                              | WP_048575085.1                 | 100%            |
| CBW6<br>4_RS2<br>0290 | 139 | 150 | NR<br><br>SwissProt | <i>Novosphingobium</i> sp. KN65.2<br>hypothetical protein, partial<br>Serine recombinase gin                                                           | WP_054947562.1<br><br>P03015.2 | 100%<br><br>43% |
| CBW6<br>4_RS2<br>2300 | 177 | 313 | NR<br><br>SwissProt | <i>Sphingomonas</i> -like bacterium<br>B12<br>RNA polymerase subunit<br>sigma<br>ECF RNA polymerase sigma<br>factor SigJ                               | WP_051035096.1<br><br>L0TCG5.1 | 98%<br><br>37%  |
| CBW6<br>4_RS2<br>2305 | 177 | 146 | NR<br><br>SwissProt | <i>Novosphingobium</i> sp. KN65.2<br>hypothetical protein<br>Undecaprenyl<br>phosphate-alpha-4-amino-4-de<br>oxy-L-arabinose arabinosyl<br>transferase | WP_054948431.1<br><br>Q48HY9.1 | 97%<br><br>37%  |
| CBW6<br>4_RS2<br>2310 | 177 | 253 | NR<br><br>SwissProt | <i>Novosphingobium</i> sp. KN65.2<br>NAD-dependent<br>epimerase/dehydratase<br>Uncharacterized protein YbjT                                            | CDO38883.1<br><br>P75822.2     | 100%<br><br>24% |
| CBW6<br>4_RS2<br>2315 | 177 | 148 | NR<br><br>SwissProt | <i>Sphingomonas</i> -like bacterium<br>B12<br>Alkylhydroperoxidase<br>Uncharacterized protein YdfG                                                     | WP_026095316.1<br><br>P96684.1 | 97%<br><br>34%  |
| CBW6                  | 180 | 109 | NR                  | <i>Novosphingobium</i> sp. KN65.2                                                                                                                      | CDO34166.1                     | 100%            |

|                                                  |            |            |                                   |                                                                                                                                                  |                                |                 |
|--------------------------------------------------|------------|------------|-----------------------------------|--------------------------------------------------------------------------------------------------------------------------------------------------|--------------------------------|-----------------|
| 4_RS2<br>2410                                    |            |            | SwissProt                         | hypothetical protein<br>NA                                                                                                                       |                                |                 |
| <b>CBW<br/>64_RS<br/>22415<br/>(<i>cehA</i>)</b> | <b>180</b> | <b>794</b> | <b>NR</b><br><br><b>SwissProt</b> | <b><i>Rhizobium</i> sp. AC100<br/>carbaryl hydrolase<br/>NA</b>                                                                                  | <b>WP_032490241.1</b>          | <b>99%</b>      |
| CBW6<br>4_RS2<br>2420                            | 180        | 798        | NR<br><br>SwissProt               | <i>Novosphingobium</i> sp. KN65.2<br>hypothetical protein<br>Pesticin receptor                                                                   | WP_054944686.1<br><br>P0C2M9.1 | 99%<br><br>23%  |
| CBW6<br>4_RS2<br>2430                            | 180        | 226        | NR<br><br>SwissProt               | <i>Streptomyces</i> pluripotens<br>TetR family transcriptional<br>regulator, partial<br>Transposon Tn10 TetC protein                             | WP_043419395.1<br><br>P28815.1 | 41%<br><br>42%  |
| CBW6<br>4_RS2<br>2435                            | 180        | 94         | NR<br><br>SwissProt               | <i>Novosphingobium</i> sp. KN65.2<br>hypothetical protein<br>Anthranilate<br>3-monoxygenase oxygenase<br>component                               | WP_054944687.1<br><br>A4IT51.1 | 100%<br><br>36% |
| CBW6<br>4_RS2<br>4070                            | 228        | 86         | NR<br><br>SwissProt               | <i>Brevundimonas</i> diminuta<br>aromatic amino acid<br>transferase<br>Probable<br>5-dehydro-4-deoxyglucarate<br>dehydratase                     | WP_032495125.1<br><br>Q3KI36.1 | 100%<br><br>45% |
| CBW6<br>4_RS2<br>4075                            | 228        | 478        | NR<br><br>SwissProt               | <i>Novosphingobium</i> sp. KN65.2<br>putative N6 adenine-specific<br>DNA methyltransferase<br>Ribosomal RNA small subunit<br>methyltransferase A | CDO34218.1<br><br>A1WVT7.1     | 100%<br><br>34% |
| CBW6<br>4_RS2<br>4085                            | 228        | 82         | NR<br><br>SwissProt               | <i>Sphingomonadaceae</i><br>MULTISPECIES:<br>hypothetical protein<br>NA                                                                          | WP_030541643.1                 | 100%            |
| CBW6<br>4_RS2<br>4090                            | 228        | 269        | NR<br><br>SwissProt               | <i>Sphingomonadaceae</i><br>MULTISPECIES:<br>hypothetical protein<br>Holliday junction<br>ATP-dependent DNA helicase<br>RuvA                     | WP_008831890.1<br><br>Q5PBM0.1 | 100%<br><br>24% |
| CBW6<br>4_RS2<br>4095                            | 228        | 160        | NR<br><br>SwissProt               | <i>Sphingomonadaceae</i><br>MULTISPECIES:<br>hypothetical protein<br>Uncharacterized protein YfjM                                                | WP_008831891.1<br><br>O31547.1 | 100%<br><br>32% |

|                       |     |     |                     |                                                                                                                                |                                |                 |
|-----------------------|-----|-----|---------------------|--------------------------------------------------------------------------------------------------------------------------------|--------------------------------|-----------------|
| CBW6<br>4_RS2<br>4100 | 228 | 85  | NR<br><br>SwissProt | <i>Sphingomonadaceae</i><br>MULTISPECIES:<br>hypothetical protein<br>NA                                                        | WP_008831892.1                 | 99%             |
| CBW6<br>4_RS2<br>4330 | 238 | 95  | NR<br><br>SwissProt | <i>Sphingomonadaceae</i><br>MULTISPECIES:<br>hypothetical protein<br>Leucine--tRNA ligase                                      | WP_030541545.1<br><br>Q3J7S8.1 | 100%<br><br>33% |
| CBW6<br>4_RS2<br>4335 | 238 | 88  | NR<br><br>SwissProt | <i>Sphingomonadaceae</i><br>MULTISPECIES:<br>hypothetical protein<br>Uroporphyrinogen-III<br>synthase                          | WP_008831641.1<br><br>Q59335.1 | 100%<br><br>57% |
| CBW6<br>4_RS2<br>4340 | 238 | 69  | NR<br><br>SwissProt | <i>Sphingomonadaceae</i><br>MULTISPECIES:<br>hypothetical protein<br>NA                                                        | WP_004213310.1                 | 100%            |
| CBW6<br>4_RS2<br>4345 | 238 | 177 | NR<br><br>SwissProt | <i>Sphingomonas</i> sp. LH128<br>hypothetical protein<br>NA                                                                    | WP_037520606.1                 | 100%            |
| CBW6<br>4_RS2<br>4350 | 238 | 96  | NR<br><br>SwissProt | <i>Sphingomonadaceae</i><br>MULTISPECIES:<br>hypothetical protein<br>Peroxisomal acyl-coenzyme A<br>oxidase 3                  | WP_008831821.1<br><br>Q9EPL9.2 | 100%<br><br>53% |
| CBW6<br>4_RS2<br>4355 | 238 | 78  | NR<br><br>SwissProt | <i>Sphingomonadaceae</i><br>MULTISPECIES:<br>hypothetical protein<br>Oxidized low-density<br>lipoprotein receptor 1            | WP_008831822.1<br><br>Q9EQ09.2 | 100%<br><br>48% |
| CBW6<br>4_RS2<br>4690 | 254 | 477 | NR<br><br>SwissProt | <i>Novosphingobium</i> sp. KN65.2<br>putative conjugal transfer<br>protein; traA<br>Probable conjugal transfer<br>protein TraA | CDO37889.1<br><br>P55418.1     | 95%<br><br>39%  |
| CBW6<br>4_RS2<br>4695 | 254 | 245 | NR<br><br>SwissProt | <i>Sphingomonadaceae</i><br>MULTISPECIES:<br>hypothetical protein<br>NA                                                        | WP_017501675.1                 | 100%            |
| CBW6<br>4_RS2<br>4700 | 254 | 89  | NR<br><br>SwissProt | <i>Novosphingobium</i> sp. KN65.2<br>Conserved hypothetical<br>protein<br>Probable<br>S-adenosyl-L-methionine-dep              | CDO37891.1<br><br>P45134.1     | 100%<br><br>32% |

|                                                  |            |            |                                   |                                                                                                               |                                         |                         |
|--------------------------------------------------|------------|------------|-----------------------------------|---------------------------------------------------------------------------------------------------------------|-----------------------------------------|-------------------------|
|                                                  |            |            |                                   | endent methyltransferase TehB                                                                                 |                                         |                         |
| CBW6<br>4_RS2<br>5130                            | 277        | 211        | NR<br><br>SwissProt               | <i>Sphingomonadaceae</i><br>MULTISPECIES:<br>phosphopantetheine--protein<br>transferase<br>Protein ParA       | WP_017501684.1<br><br>P07175.1          | 100%<br><br>27%         |
| CBW6<br>4_RS2<br>5135                            | 277        | 94         | NR<br><br>SwissProt               | <i>Sphingomonadaceae</i><br>MULTISPECIES:<br>hypothetical protein<br>Telomerase reverse<br>transcriptase      | WP_017501683.1<br><br>Q1PS67.2          | 100%<br><br>35%         |
| CBW6<br>4_RS2<br>5140                            | 277        | 367        | NR<br><br>SwissProt               | <i>Sphingomonadaceae</i><br>MULTISPECIES:<br>hypothetical protein<br>Putative replication protein             | WP_004213366.1<br><br>P60119.1          | 100%<br><br>38%         |
| CBW6<br>4_RS2<br>5205                            | 283        | 51         | NR<br><br>SwissProt               | <i>Sphingobium</i><br>MULTISPECIES:<br>transcription elongation<br>protein SprT<br>NA                         | WP_020817759.1                          | 100%                    |
| CBW6<br>4_RS2<br>5290                            | 288        | 459        | NR<br><br>SwissProt               | <i>Sphingomonas</i> sp. MEA3-1<br>transposase, partial<br>Transposase for transposon<br>Tn4430                | WP_048578782.1<br><br>P10021.1          | 100%<br><br>27%         |
| CBW6<br>4_RS2<br>5295                            | 288        | 288        | NR<br><br>SwissProt               | <i>Sphingomonas wittichii</i> RW1<br>Resolvase, N-terminal domain<br>(plasmid)<br>Integrase-like protein y4IS | ABQ71233.1<br><br>P55559.1              | 100%<br><br>48%         |
| <b>CBW<br/>64_RS<br/>25315<br/>(<i>cf</i>dC)</b> | <b>290</b> | <b>395</b> | <b>NR</b><br><br><b>SwissProt</b> | <b><i>Novosphingobium</i> sp.<br/>KN65.2<br/>hypothetical protein<br/>Pigment production<br/>hydroxylase</b>  | <b>WP_054944612.1<br/><br/>P26698.1</b> | <b>99%<br/><br/>37%</b> |
| CBW6<br>4_RS2<br>5320                            | 290        | 220        | NR<br><br>SwissProt               | <i>Novosphingobium</i> sp. KN65.2<br>hypothetical protein<br>Fatty acid metabolism<br>regulator protein       | WP_054944613.1<br><br>P94548.1          | 99%<br><br>24%          |
| CBW6<br>4_RS2<br>5460                            | 301        | 209        | NR<br><br>SwissProt               | <i>Sphingomonas</i> sp. DC-6<br>conjugal transfer protein TraG,<br>partial<br>Protein virD4                   | WP_030092925.1<br><br>P13464.1          | 100%<br><br>35%         |
| CBW6<br>4_RS2<br>5465                            | 301        | 143        | NR                                | <i>Sphingomonadaceae</i><br>MULTISPECIES:<br>hypothetical protein                                             | WP_017501681.1                          | 100%                    |



|                       |     |     |           |                                                                                            |                |      |
|-----------------------|-----|-----|-----------|--------------------------------------------------------------------------------------------|----------------|------|
|                       |     |     | SwissProt | Ragulator complex protein<br>LAMTOR3                                                       | Q4SSF5.1       | 37%  |
| CBW6<br>4_RS2<br>5505 | 305 | 288 | NR        | <i>Sphingomonas wittichii</i> RW1<br>Resolvase,N-terminal domain<br>(plasmid)              | ABQ71679.1     | 100% |
|                       |     |     | SwissProt | Integrase-like protein y4IS                                                                | P55559.1       | 45%  |
| CBW6<br>4_RS2<br>5510 | 305 | 249 | NR        | <i>Sphingomonas</i> sp. SRS2<br>Transposase                                                | KKC25847.1     | 100% |
|                       |     |     | SwissProt | Transposase for transposon<br>Tn1721                                                       | P51565.1       | 30%  |
| CBW6<br>4_RS2<br>5555 | 309 | 195 | NR        | <i>Mastigocladus laminosus</i><br>hypothetical protein                                     | WP_044449036.1 | 30%  |
|                       |     |     | SwissProt | Argininosuccinate synthase                                                                 | A9IQ90.1       | 48%  |
| CBW6<br>4_RS2<br>5560 | 309 | 377 | NR        | <i>Exiguobacterium</i> sp. S17<br>hypothetical protein                                     | EPE61704.1     | 37%  |
|                       |     |     | SwissProt | Glutamyl-tRNA(Gln)<br>amidotransferase subunit B,<br>mitochondrial                         | C5JUE6.1       | 51%  |
| CBW6<br>4_RS2<br>5595 | 312 | 69  | NR        | <i>Sphingobium</i><br>MULTISPECIES:<br>conjugal transfer protein TraG                      | WP_020817742.1 | 100% |
|                       |     |     | SwissProt | Protein virD4                                                                              | P13464.1       | 41%  |
| CBW6<br>4_RS2<br>5615 | 314 | 456 | NR        | <i>Sphingomonadaceae</i><br>MULTISPECIES: transposase                                      | WP_013039223.1 | 100% |
|                       |     |     | SwissProt | NA                                                                                         |                |      |
| CBW6<br>4_RS2<br>5665 | 321 | 179 | NR        | <i>Novosphingobium</i> sp. KN65.2<br>Putative outer membrane<br>phospholipase A (fragment) | CDO38161.1     | 100% |
|                       |     |     | SwissProt | Phospholipase A1                                                                           | P0A922.1       | 34%  |
| CBW6<br>4_RS2<br>5745 | 331 | 93  | NR        | <i>Sphingomonadaceae</i><br>MULTISPECIES:<br>DNA damage-inducible<br>protein               | WP_017501687.1 | 100% |
|                       |     |     | SwissProt | Antitoxin DinJ                                                                             | Q47150.1       | 56%  |
| CBW6<br>4_RS2<br>5750 | 331 | 106 | NR        | <i>Sphingomonadaceae</i><br>MULTISPECIES:<br>translation repressor RelE                    | WP_026109291.1 | 100% |
|                       |     |     | SwissProt | mRNA interferase YafQ                                                                      | Q47149.1       | 39%  |
| CBW6<br>4_RS2<br>5865 | 346 | 254 | NR        | <i>Gammaproteobacteria</i><br>MULTISPECIES:<br>Transposase                                 | WP_001375121.1 | 100% |
|                       |     |     | SwissProt | Transposase for insertion<br>sequence-like element<br>IS431mec                             | P0A043.1       | 42%  |

|                       |     |     |                     |                                                                                                                |                                |                 |
|-----------------------|-----|-----|---------------------|----------------------------------------------------------------------------------------------------------------|--------------------------------|-----------------|
| CBW6<br>4_RS2<br>5900 | 352 | 138 | NR<br><br>SwissProt | <i>Novosphingobium</i> sp. KN65.2<br>DNA-invertase from lambdoid<br>prophage e14<br>Transposon Tn552 resolvase | CDO38162.1<br><br>P18358.1     | 100%<br><br>32% |
| CBW6<br>4_RS2<br>5905 | 352 | 69  | NR<br><br>SwissProt | <i>Sphingomonadaceae</i><br>MULTISPECIES:<br>hypothetical protein<br>Pseudouridine kinase                      | WP_017501689.1<br><br>P30235.2 | 100%<br><br>48% |
| CBW6<br>4_RS2<br>6050 | 376 | 68  | NR<br><br>SwissProt | <i>Sphingomonadaceae</i><br>MULTISPECIES:<br>conjugal transfer protein TraD<br>NA                              | WP_017501678.1                 | 100%            |
| CBW6<br>4_RS2<br>6055 | 376 | 88  | NR<br><br>SwissProt | <i>Sphingomonadaceae</i><br>MULTISPECIES:<br>hypothetical protein<br>Arylsulfatase A                           | WP_026109288.1<br><br>P50428.2 | 100%<br><br>52% |

<sup>1</sup> Gene locus tags in GenBank database.

<sup>2</sup> Number of amino acids.

<sup>3</sup> The top BLASTP hit was selected.

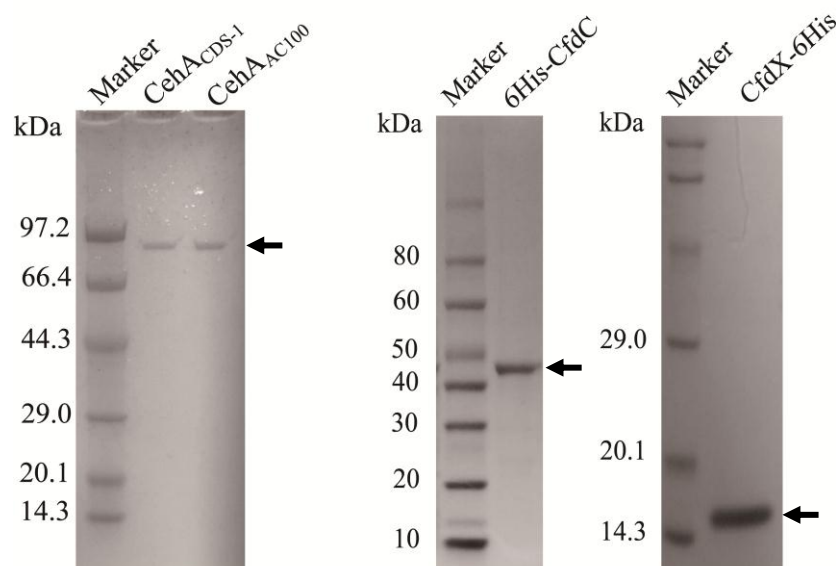

**FIG S1 SDS-PAGE results for purified 6His-CehA<sub>CDS-1</sub>, 6His-CehA<sub>AC100</sub>, 6His-CfdC and CfdX-6His.** 6His-CehA<sub>CDS-1</sub>, 6His-CehA<sub>AC100</sub>, 6His-CfdC and CfdX-6His were synthesized in *E. coli* and purified using Ni-NTA gravity column. The purified proteins were detected by 12% sodium dodecyl sulfate polyacrylamide gel electrophoresis (SDS-PAGE).

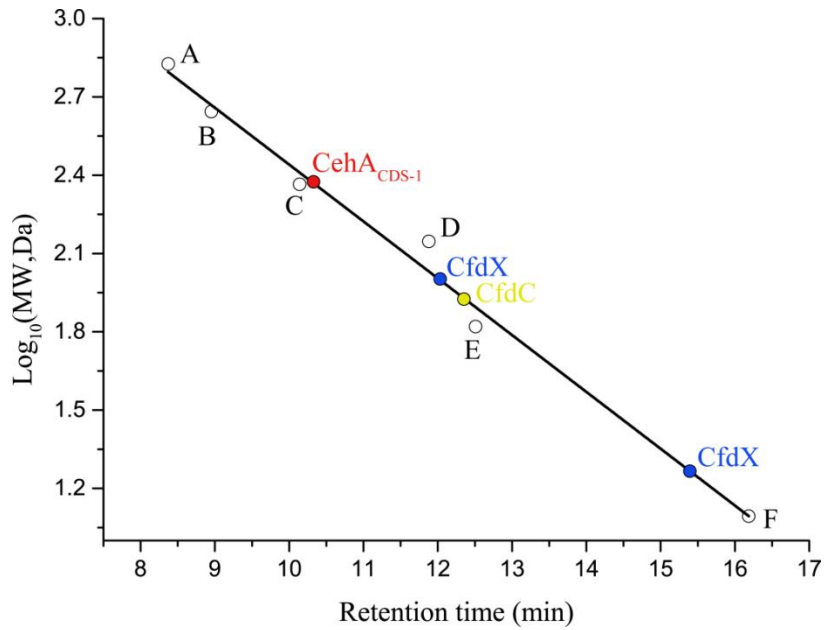

**FIG S2 Determination of native molecular mass of 6His-CehA<sub>CDS-1</sub>, 6His-CfdC and CfdX-6His based on a standard curve using gel filtration calibration kit.** The standard proteins include: thyroglobulin from porcine thyroid (A, 669 kDa), ferritin from equine spleen (B, 440 kDa), catalase from bovine liver (C, 232 kDa), lactate dehydrogenase from bovine liver (D, 140 kDa), bovine serum albumin (E, 66 kDa), Cytochrome C (F, 12.4 kDa). According to the standard curve, native 6His-CehA<sub>CDS-1</sub> is 221 kDa, native 6His-CfdC is 88 kDa, and native CfdX-6His has two forms, 106 and 18 kDa.
